# Supplementary material
Source: publisher figshare collection journal article supplement (https://gsajournals.figshare.com/ndownloader/files/28656672)
Supplement: Supplementary file 1 [file 28656672]

## Sheet: Table_S5
Table S5. Genes that are upregulated or downregulated in perithecia of deletion mutants of asm2 and asm3 compared to wild type perithecia.
The tables gives the results as log2 of fold changes and the adjusted p-values (padj) for each fold change value. Only genes with log-fold change >=2 or <=-2 and padj<=0.01 were included.
Tables A and B give only upregulated genes in delta-asm2 (A) and delta-asm3 (B), tables C and D give downregulated genes in delta-asm2 (C) and delta-asm3 (D).
Tables E and F give the locus tags of genes that are upregulated in both mutants (E) or downregulated in both mutants (F).
Table G gives the locus tags of genes that are upregulated in delta-asm2 and downregulated in delta-asm3 compared to wild type. No genes were upregulated in delta-asm3 and downregulated in delta-asm2.
Table A. asm2_p_vs_wt_p UP				Table B. asm3_p_vs_wt_p UP				Table C. asm2_p_vs_wt_p DOWN				Table D. asm3_p_vs_wt_p DOWN				Table E. UP in asm2 and asm3		Table F. DOWN in asm2 and asm3		Table G. UP in asm2 and DOWN in asm3
locus_tag	log2FoldChange	padj		locus_tag	log2FoldChange	padj		locus_tag	log2FoldChange	padj		locus_tag	log2FoldChange	padj		locus tag		locus tag		locus tag
SMAC_00337	3.5605	3.16932e-37		SMAC_06919	4.14505	1.77157e-21		SMAC_06378	-3.56659	5.3804e-50		SMAC_06378	-6.35717	2.39366e-115		SMAC_00030		SMAC_00288		SMAC_09039
SMAC_03621	3.47288	1.12697e-36		SMAC_08605	2.75631	7.8218e-21		SMAC_08743	-2.48815	2.09575e-42		SMAC_04755	-5.2484	3.71127e-91		SMAC_00058		SMAC_00291		SMAC_07256
SMAC_06022	3.99359	3.65635e-31		SMAC_00180	2.59967	9.23843e-20		SMAC_00288	-3.24486	7.23883e-42		SMAC_04370	-5.28746	1.17054e-84		SMAC_00180		SMAC_00593
SMAC_09560	3.44086	6.91734e-24		SMAC_02738	3.81308	4.01315e-19		SMAC_02666	-2.54664	7.23883e-42		SMAC_07687	-4.26773	1.48547e-80		SMAC_00618		SMAC_00594
SMAC_04029	3.19111	1.00236e-23		SMAC_05246	2.95869	4.05274e-19		SMAC_03692	-3.48432	3.90297e-38		SMAC_07669	-10.884	3.85075e-77		SMAC_01013		SMAC_00600
SMAC_08232	3.65385	1.30275e-23		SMAC_08963	4.53973	7.13218e-16		SMAC_07671	-5.14541	7.62663e-38		SMAC_06840	-4.20394	3.85075e-77		SMAC_01383		SMAC_00661
SMAC_04129	2.59345	1.66603e-23		SMAC_09026	4.40836	3.04069e-14		SMAC_07723	-4.57906	1.11882e-37		SMAC_02704	-6.70597	1.37074e-67		SMAC_02241		SMAC_00736
SMAC_09151	2.42134	6.26227e-23		SMAC_07592	2.77653	6.54986e-14		SMAC_04370	-3.37113	1.2357e-37		SMAC_03692	-4.61674	8.44293e-67		SMAC_02282		SMAC_00745
SMAC_01665	2.42737	2.64874e-22		SMAC_08232	2.67917	6.52225e-13		SMAC_07352	-3.32152	5.99348e-33		SMAC_03185	-8.73867	2.50199e-59		SMAC_02776		SMAC_00760
SMAC_02968	3.42036	4.3707e-21		SMAC_12935	2.89904	1.70776e-12		SMAC_07566	-2.01349	2.33344e-30		SMAC_02742	-4.83201	3.86717e-56		SMAC_03140		SMAC_00767
SMAC_02862	2.36392	2.6486e-18		SMAC_07800	3.57404	1.91559e-12		SMAC_06842	-4.18965	1.38303e-29		SMAC_05680	-7.48921	4.21901e-56		SMAC_04180		SMAC_01125
SMAC_05843	3.67596	3.74046e-18		SMAC_06832	2.40783	7.3266e-12		SMAC_07687	-2.51811	2.00628e-29		SMAC_00291	-4.04563	7.39257e-56		SMAC_04400		SMAC_01220
SMAC_07279	2.40284	1.61304e-17		SMAC_03486	2.23991	1.0867e-11		SMAC_09159	-3.74071	1.1312e-28		SMAC_07723	-5.91959	2.00258e-54		SMAC_04744		SMAC_01240
SMAC_07256	2.37662	6.44211e-17		SMAC_08440	2.74673	1.62646e-11		SMAC_04755	-2.59343	1.29325e-28		SMAC_02666	-2.91533	8.56963e-53		SMAC_05495		SMAC_01815
SMAC_07183	2.69853	4.8471e-16		SMAC_04400	2.47334	1.98598e-11		SMAC_08646	-5.00713	1.70154e-28		SMAC_08033	-9.63485	3.15165e-52		SMAC_05892		SMAC_01817
SMAC_08696	2.66369	5.00522e-16		SMAC_06773	2.19216	3.04352e-11		SMAC_05680	-5.00285	2.7987e-28		SMAC_01220	-6.39441	2.30889e-50		SMAC_06006		SMAC_01818
SMAC_08233	2.94813	9.62049e-16		SMAC_09080	3.36791	3.23464e-11		SMAC_08266	-2.51504	1.04702e-27		SMAC_05124	-5.01194	1.12025e-48		SMAC_06095		SMAC_01986
SMAC_07600	2.74922	1.0912e-15		SMAC_06095	2.74727	5.71886e-11		SMAC_08656	-2.45939	2.98756e-25		SMAC_08655	-6.37887	3.00427e-48		SMAC_06644		SMAC_02055
SMAC_09220	2.5539	4.5077e-15		SMAC_01863	2.17834	5.74449e-11		SMAC_06840	-2.2466	1.38043e-24		SMAC_08743	-2.61684	4.02686e-47		SMAC_06918		SMAC_02056
SMAC_04523	2.47157	1.6122e-14		SMAC_09183	4.06147	6.17891e-11		SMAC_08655	-3.2859	2.40953e-24		SMAC_05223	-4.12515	1.90406e-45		SMAC_06919		SMAC_02470
SMAC_06098	2.24785	2.24529e-14		SMAC_03844	2.35177	2.57305e-10		SMAC_05223	-2.99819	2.40953e-24		SMAC_04966	-4.66077	3.90028e-45		SMAC_07247		SMAC_02666
SMAC_01174	2.44825	3.60053e-14		SMAC_09212	2.28306	5.11524e-10		SMAC_05271	-2.31921	2.94686e-24		SMAC_00798	-3.66191	4.08619e-45		SMAC_07508		SMAC_02728
SMAC_03112	2.85801	7.62053e-14		SMAC_02776	2.52086	7.25438e-10		SMAC_09428	-2.40699	3.14341e-24		SMAC_02890	-6.5945	1.21971e-44		SMAC_07568		SMAC_02742
SMAC_06910	2.37276	8.44865e-14		SMAC_06843	3.88438	1.26275e-09		SMAC_07131	-5.54411	3.19574e-24		SMAC_09428	-3.2699	1.33339e-43		SMAC_07569		SMAC_02890
SMAC_00043	2.78672	3.19536e-13		SMAC_06918	3.56542	2.45693e-09		SMAC_04796	-4.28515	5.37425e-24		SMAC_09240	-7.9129	1.04039e-42		SMAC_07571		SMAC_03018
SMAC_06095	3.02668	4.14868e-13		SMAC_08453	3.56192	4.0801e-09		SMAC_08720	-3.51145	5.8312e-24		SMAC_06818	-6.05708	1.93177e-42		SMAC_07592		SMAC_03151
SMAC_07626	2.06506	4.77576e-13		SMAC_03140	3.50446	5.27818e-09		SMAC_08516	-2.52112	7.14343e-24		SMAC_04378	-5.32664	1.204e-39		SMAC_07612		SMAC_03185
SMAC_06382	2.83165	5.62816e-13		SMAC_01995	3.20551	6.14897e-09		SMAC_08865	-3.85592	1.63529e-23		SMAC_07760	-5.41477	4.16997e-39		SMAC_07966		SMAC_03258
SMAC_04309	2.36436	5.83153e-13		SMAC_08233	2.18586	6.70016e-09		SMAC_07288	-3.04768	4.69876e-23		SMAC_12893	-4.75876	1.41126e-38		SMAC_07967		SMAC_03462
SMAC_00180	2.03165	4.86458e-12		SMAC_01984	3.27061	6.92538e-09		SMAC_00291	-2.433	4.84743e-23		SMAC_00288	-3.15319	3.26956e-38		SMAC_08207		SMAC_03547
SMAC_01804	2.0378	1.43666e-11		SMAC_00618	4.39173	7.01015e-09		SMAC_01818	-3.15094	5.28742e-23		SMAC_05664	-3.03974	1.31708e-36		SMAC_08232		SMAC_03548
SMAC_00190	2.02207	2.01285e-11		SMAC_07967	4.28204	7.23339e-09		SMAC_03714	-4.65564	6.26227e-23		SMAC_07671	-6.53514	3.66755e-36		SMAC_08233		SMAC_03562
SMAC_06368	2.13942	2.443e-11		SMAC_05892	3.6755	7.42915e-09		SMAC_08829	-3.76163	6.41031e-23		SMAC_00661	-3.62028	4.76859e-36		SMAC_08440		SMAC_03563
SMAC_02776	2.67101	3.99479e-11		SMAC_04180	4.79836	8.59803e-09		SMAC_08961	-4.08744	6.60458e-23		SMAC_04324	-2.99933	6.07514e-36		SMAC_08453		SMAC_03633
SMAC_09350	2.73853	4.13721e-11		SMAC_00886	3.95132	8.91588e-09		SMAC_09240	-5.56676	9.26333e-23		SMAC_05271	-2.8384	8.33155e-36		SMAC_08495		SMAC_03692
SMAC_03106	1.99559	5.88258e-11		SMAC_01047	3.63922	9.60757e-09		SMAC_01125	-3.19324	1.75652e-22		SMAC_07670	-6.42808	2.85912e-35		SMAC_08963		SMAC_03714
SMAC_00009	2.61424	6.20267e-11		SMAC_04179	2.59075	1.02801e-08		SMAC_09520	-4.65794	1.52806e-21		SMAC_07193	-4.28359	2.55497e-34		SMAC_08977		SMAC_04213
SMAC_01189	4.4383	7.45855e-11		SMAC_07515	3.55822	1.04759e-08		SMAC_08330	-4.4221	2.15699e-21		SMAC_08720	-4.47787	2.81513e-33		SMAC_08986		SMAC_04370
SMAC_07414	2.39842	1.2221e-10		SMAC_02445	2.65163	1.11535e-08		SMAC_05679	-5.15111	4.3707e-21		SMAC_05994	-7.98621	4.11842e-33		SMAC_09000		SMAC_04378
SMAC_08589	2.10809	1.56849e-10		SMAC_03812	3.01809	1.14981e-08		SMAC_04396	-3.15587	3.04125e-20		SMAC_08266	-2.75973	4.42253e-33		SMAC_09102		SMAC_04396
SMAC_05128	2.57571	2.00439e-10		SMAC_04768	2.58943	1.18512e-08		SMAC_04696	-2.19995	6.76142e-20		SMAC_07288	-3.68186	7.75182e-33		SMAC_09183		SMAC_04397
SMAC_06103	2.70026	2.82422e-10		SMAC_07128	3.25349	1.26295e-08		SMAC_08764	-3.86788	8.05932e-20		SMAC_02681	-6.66002	1.20129e-32		SMAC_09758		SMAC_04696
SMAC_01383	2.46478	3.27109e-10		SMAC_04622	2.70582	2.5689e-08		SMAC_08987	-4.3176	1.91568e-19		SMAC_04213	-3.77214	1.86399e-32		SMAC_10454		SMAC_04724
SMAC_06919	2.83769	4.03235e-10		SMAC_06644	3.74019	2.97975e-08		SMAC_08367	-2.30808	3.50165e-19		SMAC_05606	-2.24504	2.71564e-32		SMAC_12935		SMAC_04755
SMAC_03627	3.20194	4.83855e-10		SMAC_00058	3.58004	3.09488e-08		SMAC_12893	-3.30402	4.89976e-19		SMAC_07756	-6.40079	4.82524e-32				SMAC_04787
SMAC_01414	2.97455	7.59722e-10		SMAC_08753	4.81785	3.17489e-08		SMAC_12746	-4.36419	8.81176e-19		SMAC_05172	-3.7363	6.33054e-32				SMAC_04796
SMAC_08207	3.69696	7.80277e-10		SMAC_05495	3.47699	3.17489e-08		SMAC_12903	-4.10646	1.2319e-18		SMAC_08214	-3.88413	3.0257e-31				SMAC_04915
SMAC_00221	2.23718	1.03535e-09		SMAC_07966	3.43764	5.04297e-08		SMAC_05676	-5.34896	1.0624e-17		SMAC_07194	-6.09044	3.74225e-31				SMAC_04981
SMAC_03916	2.05007	1.10432e-09		SMAC_06229	2.56547	6.3869e-08		SMAC_08375	-2.21338	1.06982e-17		SMAC_08029	-6.97539	7.65544e-31				SMAC_05091
SMAC_08495	2.62722	2.3171e-09		SMAC_08189	3.24023	7.75027e-08		SMAC_03562	-4.92312	1.68684e-17		SMAC_09706	-4.76749	3.95967e-30				SMAC_05124
SMAC_09516	2.64992	2.3477e-09		SMAC_06841	3.50268	8.46054e-08		SMAC_00736	-2.2864	7.55801e-17		SMAC_03784	-2.49075	5.82755e-30				SMAC_05172
SMAC_09687	2.42905	7.06518e-09		SMAC_01130	2.88337	1.362e-07		SMAC_08373	-2.48807	8.45841e-17		SMAC_03714	-6.82556	1.28541e-29				SMAC_05177
SMAC_07577	2.86053	8.86254e-09		SMAC_01013	2.83895	1.90723e-07		SMAC_00600	-3.24541	1.43294e-16		SMAC_05679	-7.27024	1.78545e-29				SMAC_05203
SMAC_09150	2.21595	1.36812e-08		SMAC_08977	3.77479	2.41012e-07		SMAC_02470	-2.77512	1.6867e-16		SMAC_09159	-3.80548	3.83602e-29				SMAC_05223
SMAC_01548	2.42193	1.50237e-08		SMAC_04176	2.3185	2.46249e-07		SMAC_08033	-4.88756	1.83901e-16		SMAC_08646	-6.1858	3.93832e-29				SMAC_05271
SMAC_08440	2.34286	1.93828e-08		SMAC_12891	3.25199	2.48291e-07		SMAC_05994	-4.68089	4.45258e-16		SMAC_00856	-3.47131	2.76502e-28				SMAC_05382
SMAC_04400	2.1083	2.25678e-08		SMAC_01654	2.47735	2.72502e-07		SMAC_04213	-2.27715	4.45258e-16		SMAC_06782	-7.12676	4.76812e-28				SMAC_05483
SMAC_09039	3.13161	2.46938e-08		SMAC_07569	2.42147	3.69493e-07		SMAC_03018	-3.26062	7.91008e-16		SMAC_08829	-4.8035	6.96091e-28				SMAC_05484
SMAC_05622	2.02073	5.72337e-08		SMAC_07247	3.15479	3.89678e-07		SMAC_08508	-2.63425	1.07941e-15		SMAC_08516	-2.7813	7.26099e-28				SMAC_05609
SMAC_12935	2.29385	6.45136e-08		SMAC_01383	2.02645	4.59989e-07		SMAC_03151	-2.90852	5.59789e-15		SMAC_07352	-3.07437	9.88346e-28				SMAC_05676
SMAC_00140	2.76426	6.79202e-08		SMAC_07612	2.37914	5.91683e-07		SMAC_03462	-3.04042	1.07129e-14		SMAC_08508	-3.70157	2.57349e-27				SMAC_05678
SMAC_01388	2.1504	7.01526e-08		SMAC_06006	3.22748	8.45021e-07		SMAC_04981	-2.63752	1.09375e-14		SMAC_08330	-5.41647	3.82689e-27				SMAC_05679
SMAC_01188	2.17092	9.46139e-08		SMAC_04238	2.03889	1.09015e-06		SMAC_03185	-3.64887	1.45715e-14		SMAC_01125	-3.51837	3.94177e-27				SMAC_05680
SMAC_07592	2.02077	1.71232e-07		SMAC_07688	2.54429	1.44838e-06		SMAC_08502	-2.98171	1.65133e-14		SMAC_08987	-5.3265	8.66991e-27				SMAC_05738
SMAC_04890	2.40983	1.79753e-07		SMAC_00789	3.00542	1.48943e-06		SMAC_00760	-2.60502	1.95048e-14		SMAC_07131	-7.03456	9.72532e-27				SMAC_05844
SMAC_01118	2.58138	2.20757e-07		SMAC_09758	3.33237	1.61279e-06		SMAC_04397	-3.17108	2.65895e-14		SMAC_08764	-5.1616	2.09216e-26				SMAC_05910
SMAC_02241	2.58575	2.25844e-07		SMAC_06498	2.48148	2.11831e-06		SMAC_02742	-2.15655	3.74367e-14		SMAC_12903	-5.26706	3.84888e-26				SMAC_05994
SMAC_00141	2.46055	3.32901e-07		SMAC_12946	2.66908	2.16976e-06		SMAC_12829	-2.55337	7.28473e-14		SMAC_02381	-2.24208	1.35898e-25				SMAC_06068
SMAC_07569	2.23038	4.36153e-06		SMAC_09718	2.8652	2.17061e-06		SMAC_07669	-2.92259	1.8856e-13		SMAC_08367	-2.77677	1.9319e-25				SMAC_06327
SMAC_04685	2.30582	5.58763e-06		SMAC_06680	2.40992	2.2153e-06		SMAC_00661	-2.13077	1.96832e-13		SMAC_01402	-2.42678	6.95946e-25				SMAC_06378
SMAC_05384	2.9376	9.68493e-06		SMAC_07969	2.18101	2.5551e-06		SMAC_01220	-2.60408	2.14864e-13		SMAC_03283	-4.19341	2.00119e-24				SMAC_06634
SMAC_07571	3.0465	1.91179e-05		SMAC_08823	3.89036	2.84879e-06		SMAC_08379	-2.19677	2.58842e-13		SMAC_08197	-3.26218	4.47773e-24				SMAC_06782
SMAC_06956	2.10495	2.00581e-05		SMAC_08495	2.13407	3.09584e-06		SMAC_05172	-2.3079	3.63152e-13		SMAC_05910	-3.19101	5.56387e-24				SMAC_06783
SMAC_07612	2.07955	2.04485e-05		SMAC_03790	2.53232	3.52802e-06		SMAC_09706	-2.74361	4.77036e-13		SMAC_01818	-3.24609	9.48184e-24				SMAC_06818
SMAC_05872	2.049	2.94428e-05		SMAC_07568	2.93903	3.85764e-06		SMAC_05203	-3.60076	4.81387e-13		SMAC_05779	-8.19043	1.31929e-23				SMAC_06825
SMAC_06363	2.70605	3.36467e-05		SMAC_02282	3.25922	4.41807e-06		SMAC_04729	-2.28289	5.89844e-13		SMAC_03641	-2.83505	3.30207e-23				SMAC_06840
SMAC_02282	2.83816	9.48612e-05		SMAC_08377	2.5582	4.90416e-06		SMAC_05678	-3.95555	7.60271e-13		SMAC_04397	-4.17813	9.09869e-23				SMAC_06842
SMAC_05106	2.30163	0.000114607		SMAC_07359	2.24431	5.43634e-06		SMAC_03186	-2.99803	1.5904e-12		SMAC_02728	-4.878	9.59382e-23				SMAC_07089
SMAC_07134	2.43398	0.000124707		SMAC_04321	3.08625	7.59562e-06		SMAC_07172	-2.07446	2.73132e-12		SMAC_00736	-2.87292	1.5377e-22				SMAC_07130
SMAC_06918	2.45159	0.000138327		SMAC_03565	2.60848	7.8444e-06		SMAC_03258	-2.9189	3.42815e-12		SMAC_06825	-3.67199	1.72837e-22				SMAC_07131
SMAC_08453	2.46835	0.000143704		SMAC_06456	2.12723	8.4629e-06		SMAC_00593	-2.61467	3.68805e-12		SMAC_04396	-3.48352	3.30544e-22				SMAC_07153
SMAC_07748	1.99707	0.000144803		SMAC_07638	2.74826	8.50788e-06		SMAC_05910	-2.21324	4.44393e-12		SMAC_05609	-2.96626	3.52917e-22				SMAC_07172
SMAC_01173	2.19499	0.000231248		SMAC_08452	3.12145	8.97613e-06		SMAC_07194	-3.52424	4.51296e-12		SMAC_08865	-3.76914	4.15591e-22				SMAC_07194
SMAC_07568	2.40965	0.000300382		SMAC_09282	2.23164	1.11916e-05		SMAC_08029	-3.55013	4.84425e-12		SMAC_08656	-2.34277	4.4089e-22				SMAC_07218
SMAC_09183	2.4489	0.000300946		SMAC_01391	2.02077	1.24716e-05		SMAC_07089	-2.88451	4.90002e-12		SMAC_04696	-2.33838	4.78834e-22				SMAC_07240
SMAC_04180	3.2773	0.000308735		SMAC_12911	3.9213	1.30055e-05		SMAC_00767	-5.57134	5.16213e-12		SMAC_04310	-3.03113	5.78474e-22				SMAC_07288
SMAC_09102	2.69593	0.000419421		SMAC_07716	2.69066	1.8716e-05		SMAC_05124	-2.15409	7.42279e-12		SMAC_07031	-2.04116	6.09279e-22				SMAC_07352
SMAC_09131	2.7254	0.000459951		SMAC_05269	2.59517	1.89616e-05		SMAC_05177	-2.39054	1.0987e-11		SMAC_03151	-3.55006	1.69018e-21				SMAC_07669
SMAC_09000	2.2933	0.000466913		SMAC_02241	2.18967	2.07542e-05		SMAC_06634	-2.37426	1.31356e-11		SMAC_04796	-4.14129	1.72855e-21				SMAC_07670
SMAC_01013	2.0109	0.000611413		SMAC_00543	2.23438	2.13973e-05		SMAC_02728	-3.02889	1.39446e-11		SMAC_03952	-2.10965	3.69003e-21				SMAC_07671
SMAC_07135	2.44571	0.000845117		SMAC_04692	4.27696	2.52598e-05		SMAC_05609	-2.02925	1.51311e-11		SMAC_03432	-2.2297	7.5419e-21				SMAC_07685
SMAC_08963	2.14489	0.000890233		SMAC_04546	2.77427	2.76175e-05		SMAC_01127	-2.33409	1.943e-11		SMAC_06068	-8.06139	9.16186e-21				SMAC_07687
SMAC_01664	2.51583	0.000936773		SMAC_01619	2.88071	3.43002e-05		SMAC_07670	-2.78621	2.776e-11		SMAC_05724	-2.17107	9.24473e-21				SMAC_07689
SMAC_04744	2.64587	0.000988753		SMAC_04985	2.43506	3.43502e-05		SMAC_00383	-2.1715	5.18815e-11		SMAC_08008	-3.05168	9.56817e-21				SMAC_07691
SMAC_05495	2.21738	0.00130167		SMAC_05936	2.01168	3.47076e-05		SMAC_01817	-2.68809	6.64847e-11		SMAC_06788	-2.61657	1.1538e-20				SMAC_07694
SMAC_09101	2.60532	0.00153868		SMAC_07974	2.35807	3.87186e-05		SMAC_05637	-2.07794	6.77988e-11		SMAC_08373	-2.83993	1.32453e-20				SMAC_07695
SMAC_00030	2.36261	0.00158317		SMAC_05592	1.99752	3.88678e-05		SMAC_12085	-3.03771	9.94349e-11		SMAC_03562	-5.4761	1.46971e-20				SMAC_07723
SMAC_10028	2.50361	0.00194645		SMAC_00899	2.99605	3.96976e-05		SMAC_07691	-2.3095	1.52064e-10		SMAC_07685	-3.85763	1.66389e-20				SMAC_07751
SMAC_09280	6.26801	0.00204078		SMAC_05038	2.51571	4.20117e-05		SMAC_05483	-3.20439	1.79028e-10		SMAC_05778	-2.32621	2.60169e-20				SMAC_07756
SMAC_06301	2.13806	0.00218522		SMAC_07213	3.21628	4.52805e-05		SMAC_07859	-2.94482	2.12714e-10		SMAC_08961	-4.49095	4.27558e-20				SMAC_07814
SMAC_04420	3.02244	0.0023681		SMAC_08207	2.64571	4.56026e-05		SMAC_08358	-2.2114	2.7967e-10		SMAC_12829	-3.76932	5.21484e-20				SMAC_07859
SMAC_07966	2.11402	0.0024476		SMAC_05698	2.11736	5.82865e-05		SMAC_06825	-2.42378	3.48022e-10		SMAC_04787	-3.09588	9.2006e-20				SMAC_08018
SMAC_07508	2.97918	0.00250955		SMAC_06819	2.24329	6.18215e-05		SMAC_05844	-2.99385	3.85301e-10		SMAC_03258	-5.77505	1.11549e-19				SMAC_08029
SMAC_03140	2.02688	0.00264264		SMAC_06075	2.81523	6.36466e-05		SMAC_05091	-2.75078	4.30569e-10		SMAC_09351	-8.56706	1.16707e-19				SMAC_08033
SMAC_01295	2.05089	0.00264974		SMAC_08986	7.39218	6.92928e-05		SMAC_05738	-2.27567	6.73588e-10		SMAC_07759	-9.68016	2.81195e-19				SMAC_08214
SMAC_00058	2.1511	0.00275201		SMAC_07906	2.19004	7.97522e-05		SMAC_08214	-2.13478	7.33692e-10		SMAC_01318	-2.27198	5.94195e-19				SMAC_08266
SMAC_07247	2.04798	0.00276779		SMAC_02482	2.74014	8.1736e-05		SMAC_04724	-2.49852	7.43841e-10		SMAC_03018	-3.54418	7.88364e-19				SMAC_08330
SMAC_05892	2.08553	0.00353359		SMAC_09286	2.21209	8.36634e-05		SMAC_02514	-9.39903	1.29191e-09		SMAC_08760	-3.04194	7.88364e-19				SMAC_08358
SMAC_06006	2.10627	0.00353522		SMAC_07571	2.83239	8.56153e-05		SMAC_06782	-2.36625	1.90534e-09		SMAC_05177	-3.01668	1.39088e-18				SMAC_08367
SMAC_09758	2.19097	0.00417015		SMAC_12889	2.2514	8.89743e-05		SMAC_04787	-2.07741	2.16736e-09		SMAC_02784	-3.71493	3.65619e-18				SMAC_08373
SMAC_10454	2.1113	0.00480541		SMAC_09102	2.92076	9.10112e-05		SMAC_08821	-2.21965	2.3477e-09		SMAC_07089	-3.60322	5.2279e-18				SMAC_08379
SMAC_00618	2.43089	0.0048142		SMAC_06844	3.82873	9.67407e-05		SMAC_09351	-5.56518	3.22078e-09		SMAC_02497	-3.04142	6.81889e-18				SMAC_08501
SMAC_07967	2.24873	0.00785198		SMAC_02910	2.29066	9.67407e-05		SMAC_07153	-3.42138	8.96474e-09		SMAC_03547	-7.93356	3.99268e-17				SMAC_08502
SMAC_06644	2.02611	0.00856466		SMAC_02720	2.29979	0.000105365		SMAC_01815	-2.97286	9.52531e-09		SMAC_07082	-2.29812	4.42987e-17				SMAC_08508
SMAC_08977	2.10522	0.0114562		SMAC_08613	2.88408	0.000128694		SMAC_07240	-2.12783	1.64617e-08		SMAC_05890	-4.85969	7.9888e-17				SMAC_08516
SMAC_08986	5.12021	0.0136068		SMAC_04140	2.51354	0.000162018		SMAC_06327	-2.27686	3.19378e-08		SMAC_07859	-3.78017	1.44965e-16				SMAC_08555
				SMAC_09093	2.84386	0.000176866		SMAC_06818	-2.52907	3.57884e-08		SMAC_00600	-3.19766	6.4215e-16				SMAC_08646
				SMAC_08693	2.32371	0.000184072		SMAC_04378	-2.0999	3.62984e-08		SMAC_06327	-3.32665	9.9971e-16				SMAC_08655
				SMAC_08945	3.07797	0.000194051		SMAC_08735	-2.03969	4.56299e-08		SMAC_00007	-2.94645	1.11238e-15				SMAC_08656
				SMAC_09492	2.08826	0.000195274		SMAC_01240	-2.45175	5.79514e-08		SMAC_12746	-4.21206	1.52696e-15				SMAC_08720
				SMAC_05329	2.0365	0.000211408		SMAC_03548	-3.0967	5.8186e-08		SMAC_09361	-4.16564	2.39908e-15				SMAC_08735
				SMAC_02702	2.04976	0.000214152		SMAC_08555	-2.23793	1.79635e-07		SMAC_07693	-2.10535	3.28741e-15				SMAC_08743
				SMAC_03457	4.08708	0.000223317		SMAC_04915	-2.40087	2.51322e-07		SMAC_02661	-2.14924	3.73368e-15				SMAC_08764
				SMAC_05870	2.49265	0.00022959		SMAC_02890	-2.48473	6.94284e-07		SMAC_06842	-12.4029	4.05918e-15				SMAC_08787
				SMAC_05217	2.67119	0.000272323		SMAC_09488	-2.0632	2.62822e-06		SMAC_09337	-4.87832	6.06541e-15				SMAC_08821
				SMAC_05612	2.79548	0.000298242		SMAC_00719	-2.17823	3.90899e-06		SMAC_01817	-3.48251	6.06541e-15				SMAC_08829
				SMAC_01236	2.34295	0.000317479		SMAC_03633	-2.48365	4.06777e-06		SMAC_09044	-5.1143	9.01675e-15				SMAC_08865
				SMAC_09550	2.27163	0.000341196		SMAC_05484	-2.38667	4.11507e-06		SMAC_07053	-2.0466	1.03537e-14				SMAC_08930
				SMAC_03150	3.33788	0.000403641		SMAC_09313	-2.56613	4.30884e-06		SMAC_05676	-4.9913	1.57608e-14				SMAC_08961
				SMAC_09814	2.2796	0.000421312		SMAC_07751	-2.17301	6.91805e-06		SMAC_07240	-2.86562	2.16247e-14				SMAC_08987
				SMAC_07753	2.53445	0.000432978		SMAC_07685	-2.00719	7.88722e-06		SMAC_05970	-2.50028	2.27308e-14				SMAC_09159
				SMAC_04704	3.43138	0.000463223		SMAC_06068	-3.89798	1.17832e-05		SMAC_04724	-3.02788	2.90568e-14				SMAC_09231
				SMAC_06391	3.10183	0.00048646		SMAC_07218	-2.21568	1.18526e-05		SMAC_07218	-5.55717	3.81103e-14				SMAC_09240
				SMAC_05264	3.3647	0.000545199		SMAC_01820	-2.63502	3.06621e-05		SMAC_03633	-3.81543	7.01102e-14				SMAC_09313
				SMAC_08019	2.22147	0.000546222		SMAC_07130	-3.62231	4.0439e-05		SMAC_08555	-6.41717	1.5193e-13				SMAC_09351
				SMAC_04248	2.25063	0.000558974		SMAC_07756	-2.40592	5.5047e-05		SMAC_01240	-3.23473	1.71205e-13				SMAC_09428
				SMAC_02963	3.37757	0.000571391		SMAC_00745	-2.46075	5.82548e-05		SMAC_04001	-2.46733	1.98025e-13				SMAC_09520
				SMAC_03715	3.09101	0.000630367		SMAC_06273	-2.37865	7.94041e-05		SMAC_07256	-2.38979	4.34796e-13				SMAC_09637
				SMAC_03184	2.02253	0.000667717		SMAC_09231	-2.19175	9.17669e-05		SMAC_05479	-2.10122	6.51028e-13				SMAC_09706
				SMAC_02275	3.26385	0.000720373		SMAC_01986	-2.32086	9.26458e-05		SMAC_08379	-2.24565	6.72507e-13				SMAC_12085
				SMAC_07483	3.19893	0.000836391		SMAC_12078	-3.03812	9.7994e-05		SMAC_01479	-3.07258	7.22647e-13				SMAC_12746
				SMAC_05108	2.41057	0.000872563		SMAC_06783	-2.12569	0.000101083		SMAC_02546	-2.24648	7.76577e-13				SMAC_12761
				SMAC_07508	3.22069	0.00090668		SMAC_07814	-2.81098	0.000126391		SMAC_03548	-4.90217	7.80884e-13				SMAC_12829
				SMAC_07028	3.12275	0.000938508		SMAC_01129	-2.40669	0.000177602		SMAC_06880	-4.23368	1.06722e-12				SMAC_12893
				SMAC_04703	3.19401	0.000974829		SMAC_07813	-2.31704	0.000306511		SMAC_00593	-8.18461	1.24613e-12				SMAC_12903
				SMAC_01759	3.23018	0.00101526		SMAC_08501	-3.31621	0.000310779		SMAC_04981	-2.40043	2.9009e-12
				SMAC_00030	2.44026	0.00107166		SMAC_07689	-2.51828	0.000326652		SMAC_07424	-2.33596	5.52455e-12
				SMAC_06885	4.00327	0.00112318		SMAC_03563	-2.88642	0.000504542		SMAC_00745	-5.55694	8.29286e-12
				SMAC_08686	2.58812	0.00115517		SMAC_08018	-2.60157	0.000565685		SMAC_07172	-2.09857	1.48133e-11
				SMAC_09582	3.05782	0.00116133		SMAC_00594	-1.99897	0.000639311		SMAC_08358	-2.37358	1.95804e-11
				SMAC_02781	3.14547	0.00118027		SMAC_12761	-2.04944	0.000814405		SMAC_08684	-2.94703	3.79433e-11
				SMAC_09136	3.66434	0.00120413		SMAC_08787	-3.3065	0.000957821		SMAC_02055	-5.99435	5.38413e-11
				SMAC_05086	2.32414	0.00127698		SMAC_03547	-3.42439	0.00113104		SMAC_01986	-4.02121	7.9834e-11
				SMAC_05939	2.14249	0.00138403		SMAC_05382	-2.52483	0.00131838		SMAC_09125	-3.01278	8.43148e-11
				SMAC_06111	2.99928	0.00138496		SMAC_01128	-2.63515	0.00139929		SMAC_12085	-3.10467	9.93659e-11
				SMAC_07402	2.0139	0.00144659		SMAC_07694	-2.34266	0.00179111		SMAC_09871	-3.70333	1.1672e-10
				SMAC_07267	3.56004	0.00203558		SMAC_09489	-2.14655	0.00253141		SMAC_08738	-2.70715	1.1672e-10
				SMAC_05920	2.63543	0.00220045		SMAC_02055	-2.05661	0.00257856		SMAC_08735	-2.51056	1.26172e-10
				SMAC_05893	2.16434	0.00262277		SMAC_05482	-2.0166	0.00294005		SMAC_03462	-2.59271	1.28452e-10
				SMAC_04957	3.17103	0.0028433		SMAC_02056	-2.25684	0.00322581		SMAC_00316	-2.06962	1.32256e-10
				SMAC_07421	2.16278	0.00286446		SMAC_09637	-2.20519	0.00373981		SMAC_05202	-2.76656	1.66318e-10
				SMAC_07151	2.14125	0.00316599		SMAC_08930	-3.4069	0.00570234		SMAC_05789	-2.08725	1.85703e-10
				SMAC_07780	3.05971	0.0032466		SMAC_00522	-2.02026	0.00815706		SMAC_05091	-2.9491	1.88601e-10
				SMAC_07473	3.31209	0.00331077		SMAC_07154	-2.27257	0.00874573		SMAC_05203	-3.29661	2.13157e-10
				SMAC_05885	2.17811	0.00333438		SMAC_03188	-2.30056	0.00967101		SMAC_06783	-3.69254	2.82003e-10
				SMAC_02874	3.51285	0.00340442		SMAC_07695	-3.41477	0.0114518		SMAC_02522	-2.56532	3.34678e-10
				SMAC_02054	2.12505	0.0035733		SMAC_09160	-3.04691	0.0140816		SMAC_08929	-4.68413	3.5464e-10
				SMAC_05225	2.22801	0.00359913						SMAC_08553	-2.16589	3.54913e-10
				SMAC_03859	2.0876	0.00368172						SMAC_05738	-2.49993	3.98906e-10
				SMAC_09000	2.00592	0.00369842						SMAC_01465	-2.26099	4.11989e-10
				SMAC_09832	3.52929	0.00389144						SMAC_03723	-2.39752	4.16377e-10
				SMAC_09704	2.04195	0.00455773						SMAC_12949	-3.69012	4.40779e-10
				SMAC_06943	3.09237	0.00462515						SMAC_12749	-2.7019	5.02017e-10
				SMAC_08604	2.06365	0.00465466						SMAC_12697	-2.72357	5.13221e-10
				SMAC_10454	2.11301	0.00505538						SMAC_06294	-2.33175	6.47264e-10
				SMAC_02873	3.83454	0.00573202						SMAC_02682	-2.30351	7.18105e-10
				SMAC_09011	2.0198	0.00605536						SMAC_08222	-3.40875	8.12168e-10
				SMAC_01431	2.08757	0.00640368						SMAC_05678	-3.6991	1.16665e-09
				SMAC_08154	2.07577	0.0064925						SMAC_00767	-5.76393	1.28103e-09
				SMAC_01449	2.95734	0.00660647						SMAC_02865	-2.40471	1.29336e-09
				SMAC_07500	2.26523	0.00689113						SMAC_12112	-2.23154	1.47662e-09
				SMAC_09447	6.40811	0.00745232						SMAC_08880	-2.48491	1.69204e-09
				SMAC_04767	2.24104	0.00747151						SMAC_06642	-2.28171	1.71785e-09
				SMAC_05292	2.23312	0.00806058						SMAC_01329	-2.61882	1.84083e-09
				SMAC_07946	2.74432	0.00894727						SMAC_06634	-2.12705	1.97228e-09
				SMAC_07489	1.99621	0.00954665						SMAC_06839	-2.86811	2.56087e-09
				SMAC_04525	3.45318	0.0100556						SMAC_07751	-2.81053	2.72567e-09
				SMAC_02067	2.50798	0.0102772						SMAC_07597	-4.39287	2.98662e-09
				SMAC_06082	2.24876	0.0104761						SMAC_04915	-3.16426	3.04475e-09
				SMAC_04182	2.59011	0.0108763						SMAC_07153	-4.53402	3.34323e-09
				SMAC_07988	2.69772	0.0110382						SMAC_06565	-2.14606	3.39477e-09
				SMAC_07596	2.6667	0.0114309						SMAC_08502	-2.40623	3.50892e-09
				SMAC_06150	3.27282	0.011478						SMAC_04093	-2.19283	4.10646e-09
				SMAC_09319	2.09688	0.0124379						SMAC_09313	-7.16327	5.78742e-09
				SMAC_05871	2.26104	0.0127838						SMAC_07893	-2.59488	6.30903e-09
				SMAC_02911	2.13939	0.0130515						SMAC_08821	-2.21883	6.46668e-09
				SMAC_05697	2.7722	0.0131314						SMAC_09520	-9.06558	8.91588e-09
				SMAC_04744	2.12463	0.0133195						SMAC_02470	-2.00096	9.66621e-09
				SMAC_09341	2.24519	0.0149715						SMAC_05891	-2.24667	1.16573e-08
												SMAC_00760	-1.99772	1.18512e-08
												SMAC_03241	-2.90588	1.43017e-08
												SMAC_07691	-2.07705	1.80017e-08
												SMAC_08518	-2.17025	2.29755e-08
												SMAC_09196	-2.70124	2.76731e-08
												SMAC_05483	-2.88453	3.08785e-08
												SMAC_08340	-2.11837	3.37455e-08
												SMAC_12735	-2.73338	3.86328e-08
												SMAC_05844	-2.6294	5.71543e-08
												SMAC_00005	-4.90258	5.95498e-08
												SMAC_05889	-5.70307	6.0487e-08
												SMAC_07850	-2.45341	6.16059e-08
												SMAC_00321	-3.35573	6.31629e-08
												SMAC_06976	-2.70452	6.34027e-08
												SMAC_02878	-2.28786	6.96339e-08
												SMAC_02035	-5.68697	7.40659e-08
												SMAC_05484	-2.9237	7.55589e-08
												SMAC_00887	-2.11774	7.6816e-08
												SMAC_01537	-2.14349	7.92037e-08
												SMAC_06505	-3.46398	8.46189e-08
												SMAC_08624	-2.03648	9.2605e-08
												SMAC_06028	-2.89188	9.60907e-08
												SMAC_08428	-2.63932	1.10512e-07
												SMAC_09259	-2.27585	1.137e-07
												SMAC_08626	-3.64599	1.52537e-07
												SMAC_05036	-2.37312	1.64299e-07
												SMAC_03708	-2.02269	1.8309e-07
												SMAC_01406	-2.37255	2.66537e-07
												SMAC_07673	-2.18316	2.98475e-07
												SMAC_08810	-3.01481	3.17697e-07
												SMAC_02071	-2.08325	3.50685e-07
												SMAC_12834	-2.01236	3.91128e-07
												SMAC_07725	-4.04183	4.59989e-07
												SMAC_05842	-2.16785	4.85475e-07
												SMAC_09402	-4.54229	5.00635e-07
												SMAC_07757	-3.25943	6.45854e-07
												SMAC_04322	-2.16796	7.06182e-07
												SMAC_08018	-4.05828	7.91956e-07
												SMAC_12797	-2.05228	8.75448e-07
												SMAC_09315	-3.84098	1.25019e-06
												SMAC_03568	-2.49949	1.59675e-06
												SMAC_06731	-2.14187	2.07401e-06
												SMAC_08732	-2.64396	2.11365e-06
												SMAC_03933	-2.36453	2.34681e-06
												SMAC_08399	-3.82223	2.75587e-06
												SMAC_09231	-2.51033	3.88588e-06
												SMAC_00594	-7.4882	4.84675e-06
												SMAC_02184	-3.01169	7.36346e-06
												SMAC_05192	-2.59114	8.34875e-06
												SMAC_07689	-4.96431	1.14151e-05
												SMAC_05382	-4.33787	1.38187e-05
												SMAC_09223	-2.20592	1.92849e-05
												SMAC_09490	-7.57152	2.11988e-05
												SMAC_05682	-2.70487	2.14761e-05
												SMAC_03560	-4.54572	2.47216e-05
												SMAC_09348	-3.22384	2.93299e-05
												SMAC_09630	-3.90861	3.26467e-05
												SMAC_05899	-2.39584	3.71408e-05
												SMAC_07130	-4.2593	3.77555e-05
												SMAC_01833	-3.83368	3.97075e-05
												SMAC_00061	-2.34648	4.05905e-05
												SMAC_05165	-2.24649	4.18489e-05
												SMAC_07838	-2.15921	4.36086e-05
												SMAC_01141	-2.86041	4.37015e-05
												SMAC_06389	-2.41588	7.39798e-05
												SMAC_00569	-2.67702	7.60976e-05
												SMAC_03041	-2.02032	8.69323e-05
												SMAC_01777	-2.04001	8.93053e-05
												SMAC_01815	-2.1113	9.38184e-05
												SMAC_07138	-2.87453	0.000109808
												SMAC_07750	-2.40995	0.000110061
												SMAC_04532	-2.52971	0.000116136
												SMAC_06938	-3.38735	0.000121082
												SMAC_08625	-7.14221	0.000123813
												SMAC_07768	-2.52205	0.000177332
												SMAC_09570	-3.30866	0.000193264
												SMAC_08501	-3.98564	0.000237626
												SMAC_12761	-2.26305	0.000242613
												SMAC_08527	-2.03337	0.000272305
												SMAC_01194	-3.74624	0.000277836
												SMAC_07814	-2.67106	0.000354775
												SMAC_12730	-2.66932	0.000421312
												SMAC_12788	-2.41791	0.000484122
												SMAC_07696	-5.19037	0.000510726
												SMAC_03062	-2.64933	0.000531814
												SMAC_02056	-6.03984	0.000535506
												SMAC_09746	-2.03356	0.000550595
												SMAC_01227	-3.0785	0.000589878
												SMAC_07695	-6.84884	0.000717791
												SMAC_02956	-2.36445	0.000734774
												SMAC_04023	-2.20813	0.0007797
												SMAC_03563	-3.20706	0.00080572
												SMAC_00588	-3.68425	0.000926264
												SMAC_09751	-5.97455	0.00129482
												SMAC_07287	-2.13474	0.00145947
												SMAC_03380	-2.81721	0.00157692
												SMAC_09637	-2.46409	0.00202716
												SMAC_07694	-2.29087	0.00203727
												SMAC_07663	-3.99631	0.00208705
												SMAC_05157	-2.03975	0.00254797
												SMAC_00911	-2.25936	0.00287085
												SMAC_03903	-2.29409	0.0030121
												SMAC_03381	-3.32206	0.00364524
												SMAC_01195	-2.77215	0.00404086
												SMAC_01796	-2.28709	0.00405203
												SMAC_08787	-3.05999	0.0046347
												SMAC_09039	-3.35318	0.00477579
												SMAC_07246	-2.05311	0.00488878
												SMAC_07860	-5.21729	0.00506893
												SMAC_06879	-3.83517	0.00558953
												SMAC_02743	-2.36578	0.00565109
												SMAC_07664	-2.62504	0.00583398
												SMAC_03249	-3.25481	0.00610372
												SMAC_00523	-4.40423	0.00686175
												SMAC_06660	-2.11004	0.00735106
												SMAC_08930	-4.2015	0.0081212
												SMAC_08503	-2.26643	0.00817668
												SMAC_05154	-3.07794	0.0102122
												SMAC_03848	-2.15803	0.0106763
												SMAC_06160	-2.61443	0.0108745
												SMAC_06881	-3.10772	0.0116064
												SMAC_03168	-2.06307	0.0122421
												SMAC_05875	-5.32303	0.0127481
												SMAC_06874	-5.06032	0.0130741
												SMAC_04296	-2.80953	0.0142132
